# Supplementary material for: Negative wealth shocks in later life and subsequent cognitive function in older adults in China, England, Mexico, and the USA, 2012–18: a population-based, cross-nationally harmonised, longitudinal study
Source: PubMed Central journal article supplement — Lancet Healthy Longev. Author manuscript; Available in PMC 2023 Sep 27. (PMC10529910; doi:10.1016/s2666-7568(23)00113-7), 2023-08-03
Supplement: NIHMS1928577-supplement-1.pdf [file NIHMS1928577-supplement-1.pdf]

# THE LANCET

## Healthy Longevity

### Supplementary appendix

This appendix formed part of the original submission and has been peer reviewed. We post it as supplied by the authors.

Supplement to: Cho T-C, Yu X, Gross AL, et al. Negative wealth shocks in later life and subsequent cognitive function in older adults in China, England, Mexico, and the USA, 2012–18: a population-based, cross-nationally harmonised, longitudinal study. *Lancet Healthy Longev* 2023; published online Aug 3. [https://doi.org/10.1016/S2666-7568\(23\)00113-7](https://doi.org/10.1016/S2666-7568(23)00113-7).

**Supplementary Material**

**Supplemental Table 1. Summary of data sources of the outcome, exposure, and covariates**

**Supplemental Figure 1a. Flow diagram for the CHARLS-HCAP sample in China**

**Supplemental Figure 1b. Flow diagram for the ELSA-HCAP sample in England**

**Supplemental Figure 1c. Flow diagram for the Mex-Cog sample for Mexico**

**Supplemental Figure 1d. Flow diagram for the HRS-HCAP sample for the United States**

**Supplemental Table 2. Summary of wealth components incorporated in household wealth, by country**

**Supplemental Table 3. Characteristics of CHARLS-HCAP participants aged  $\geq 65$ , comparing older adults included in the study sample vs excluded from the sample due to missing wealth information in 2015**

**Supplemental Table 4. Characteristics of ELSA-HCAP participants aged  $\geq 65$ , comparing older adults included in the study sample vs excluded from the sample due to missing wealth shocks**

**Supplemental Figure 2. Directed acyclic graph (DAG) that guided selection of plausible confounders**

**Supplemental Table 5. Percent of missing data in covariates before imputation, by country**

**Supplemental Table 6. Coefficients for negative wealth shocks and subsequent cognitive function, comparing the main study results vs additional adjustment for time-varying confounders using inverse probability of treatment (IPTW)**

**Supplemental Table 7. Coefficients for negative wealth shocks and subsequent cognitive function, comparing the main study results vs results using house value as the exposure**

**Supplemental Table 8. Coefficients for negative wealth shocks and subsequent cognitive function, comparing the main study results vs results using liquid assets as the exposure**

**Supplemental Table 9. Coefficients for negative wealth shocks and subsequent cognitive function, comparing the main study results vs results using wealth decile rank as the exposure**

**Supplemental Table 10. Coefficients for negative wealth shocks and subsequent cognitive function, comparing the main study results vs results based on the subsample at retirement age at baseline**

**Supplemental Table 11. Coefficients for negative wealth shocks and subsequent cognitive function, comparing the main study results vs results using data without imputation for missing data in covariates**

**Negative wealth shocks in later life and subsequent cognitive function among older adults: a population-based longitudinal harmonized study in China, England, Mexico, and the United States, 2012-2018**

Tsai-Chin Cho, Xuexin Yu, Alden L. Gross, Yuan S. Zhang, Jinkook Lee, Kenneth M. Langa, Lindsay C. Kobayashi

**Supplemental Table 1. Summary of data sources for the outcome, exposure, and covariates**

| Country       | Data sources                                                                |                                                                      |                            |
|---------------|-----------------------------------------------------------------------------|----------------------------------------------------------------------|----------------------------|
|               | Outcome: generalized cognitive function<br>(time point of sample recruited) | Exposure: negative wealth shocks<br>(time points of data collection) | Covariates<br>(time point) |
| China         | CHARLS-HCAP <sup>1</sup><br>(2018)                                          | CHARLS <sup>2</sup><br>(2015 & 2018)                                 | CHARLS<br>(2015)           |
| England       | ELSA-HCAP <sup>3</sup><br>(2016)                                            | ELSA <sup>4</sup><br>(2012 & 2016)                                   | ELSA<br>(2012)             |
| Mexico        | Mex-Cog <sup>5</sup><br>(2016)                                              | MHAS <sup>6</sup><br>(2012 & 2015/16)                                | MHAS<br>(2012)             |
| United States | HRS-HCAP <sup>7</sup><br>(2016)                                             | HRS <sup>8</sup><br>(2012 & 2016)                                    | HRS<br>(2012)              |

Note. The references for the datasets are as follows.

1. Meng Q, Wang H, Strauss J, et al. Validation of neuropsychological tests for the China Health and Retirement Longitudinal Study Harmonized Cognitive Assessment Protocol. *Int Psychogeriatr*. 2019;31(12):1709-1719. doi:10.1017/S1041610219000693
2. Zhao Y, Hu Y, Smith JP, Strauss J, Yang G. Cohort Profile: The China Health and Retirement Longitudinal Study (CHARLS). *International Journal of Epidemiology*. 2014;43(1):61-68. doi:10.1093/ije/dys203
3. Cadar D, Abell J, Matthews FE, et al. Cohort Profile Update: The Harmonised Cognitive Assessment Protocol Sub-study of the English Longitudinal Study of Ageing (ELSA-HCAP). *Int J Epidemiol*. 2020;50(3):725-726i. doi:10.1093/ije/dyaa227
4. Steptoe A, Breeze E, Banks J, Nazroo J. Cohort profile: the English longitudinal study of ageing. *Int J Epidemiol*. 2013;42(6):1640-1648. doi:10.1093/ije/dys168
5. Mejia-Arango S, Nevarez R, Michaels-Obregon A, et al. The Mexican Cognitive Aging Ancillary Study (Mex-Cog): Study Design and Methods. *Arch Gerontol Geriatr*. 2020;91:104210. doi:10.1016/j.archger.2020.104210
6. Wong R, Michaels-Obregon A, Palloni A. Cohort Profile: The Mexican Health and Aging Study (MHAS). *International Journal of Epidemiology*. 2017;46(2):e2. doi:10.1093/ije/dyu263
7. Langa KM, Ryan LH, McCammon RJ, et al. The Health and Retirement Study Harmonized Cognitive Assessment Protocol Project: Study Design and Methods. *Neuroepidemiology*. 2020;54(1):64-74. doi:10.1159/000503004
8. Sonnega A, Faul JD, Ofstedal MB, Langa KM, Phillips JW, Weir DR. Cohort Profile: the Health and Retirement Study (HRS). *International Journal of Epidemiology*. 2014;43(2):576-585. doi:10.1093/ije/dyu067

Supplemental Figure 1a. Flow diagram for the CHARLS-HCAP sample in China

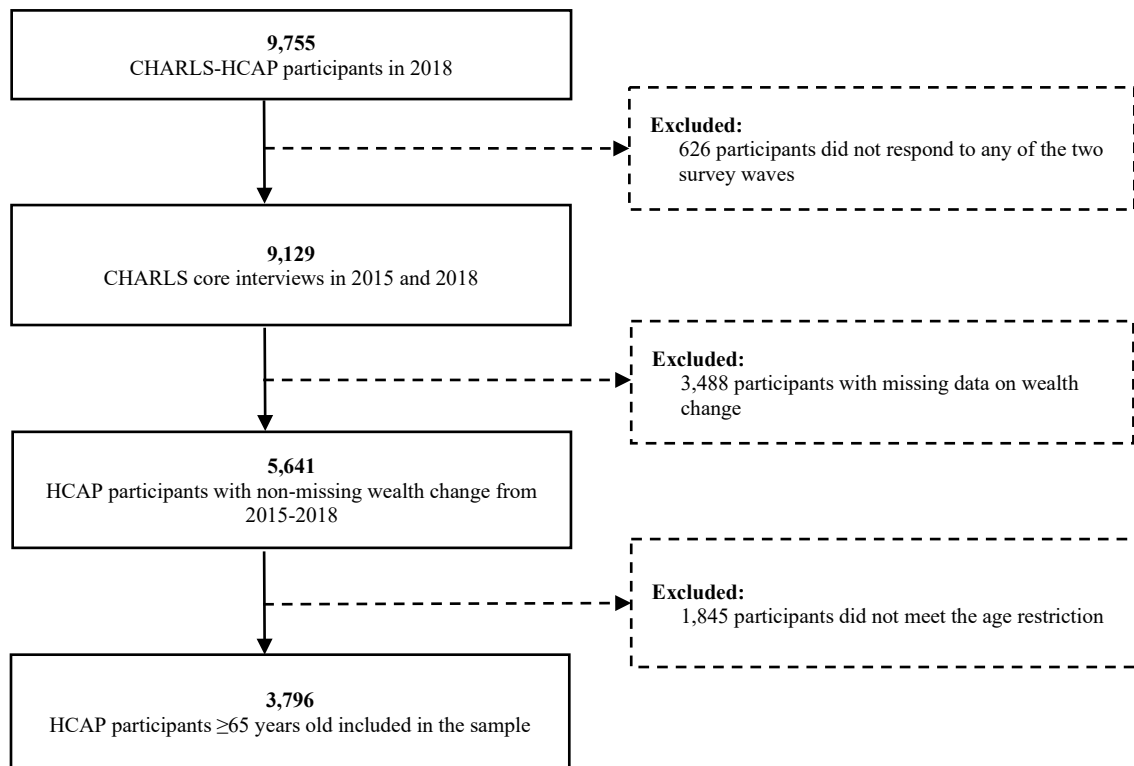

**Supplemental Figure 1b. Flow diagram for the ELSA-HCAP sample in England**

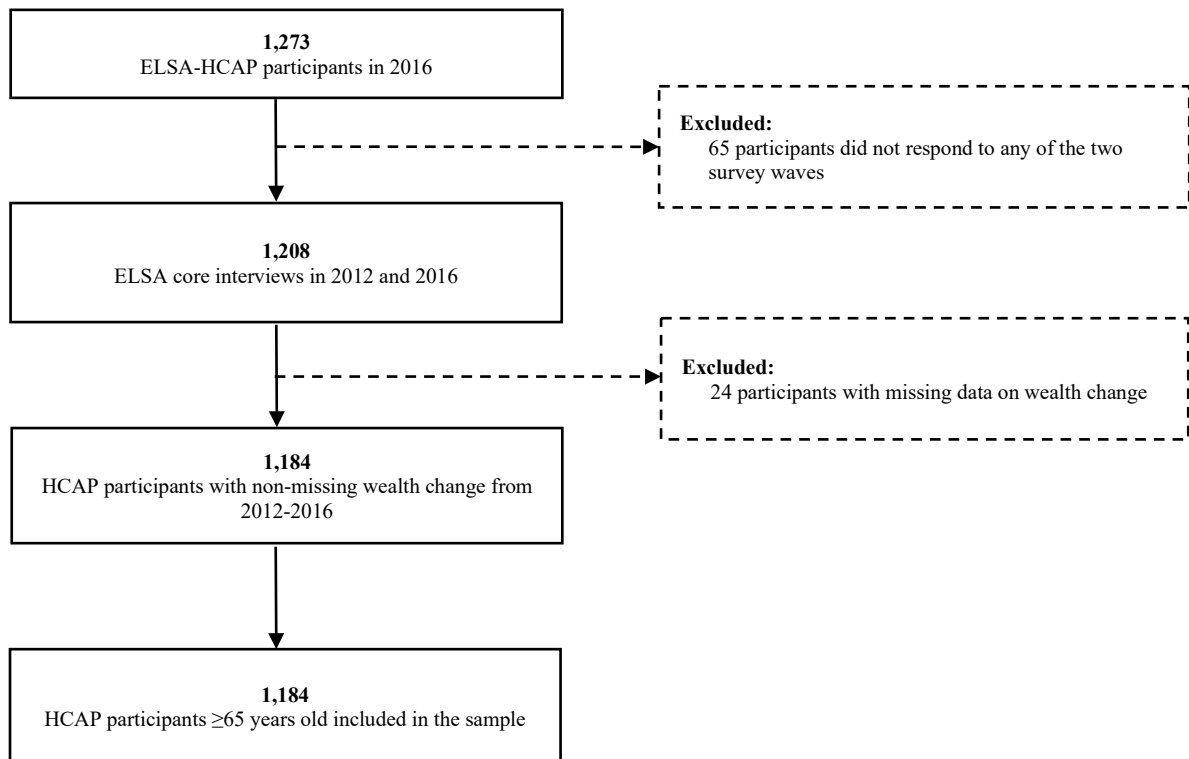

**Negative wealth shocks in later life and subsequent cognitive function among older adults: a population-based longitudinal harmonized study in China, England, Mexico, and the United States, 2012-2018**

Tsai-Chin Cho, Xuexin Yu, Alden L. Gross, Yuan S. Zhang, Jinkook Lee, Kenneth M. Langa, Lindsay C. Kobayashi

**Supplemental Figure 1c. Flow diagram for the Mex-Cog sample for Mexico**

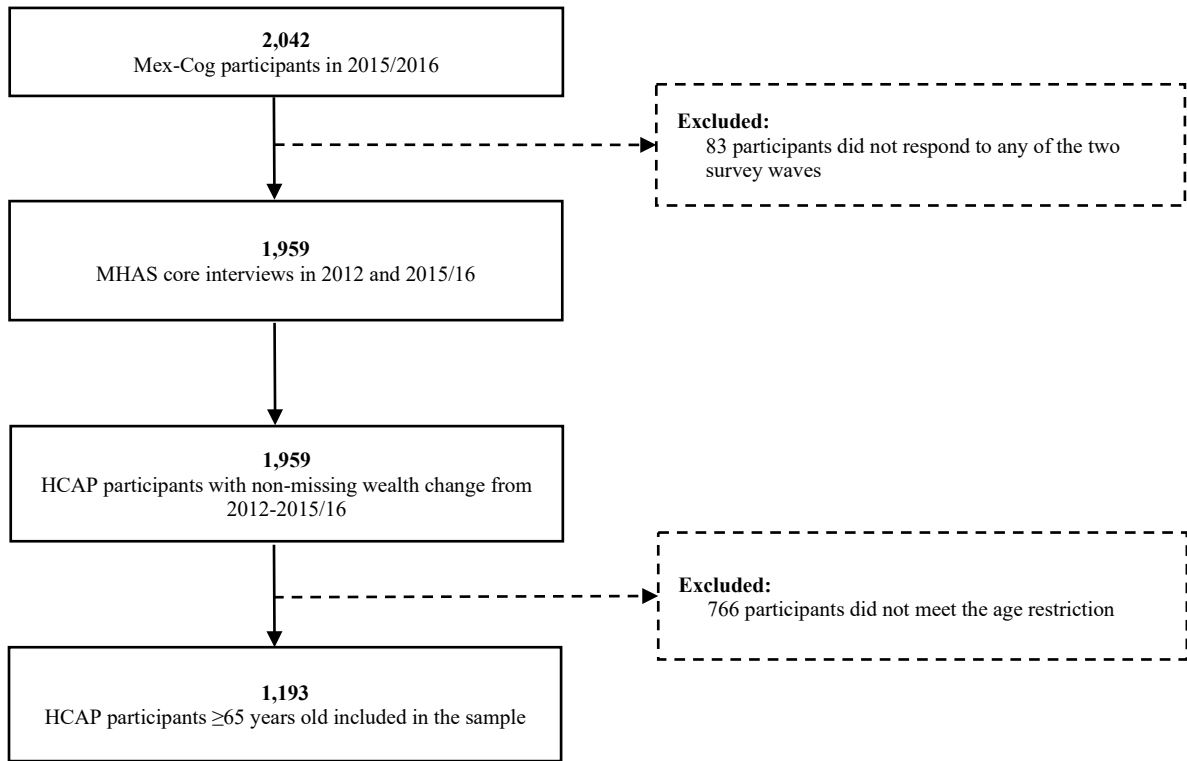

**Negative wealth shocks in later life and subsequent cognitive function among older adults: a population-based longitudinal harmonized study in China, England, Mexico, and the United States, 2012-2018**

Tsai-Chin Cho, Xuexin Yu, Alden L. Gross, Yuan S. Zhang, Jinkook Lee, Kenneth M. Langa, Lindsay C. Kobayashi

**Supplemental Figure 1d. Flow diagram for the HRS-HCAP sample for the United States**

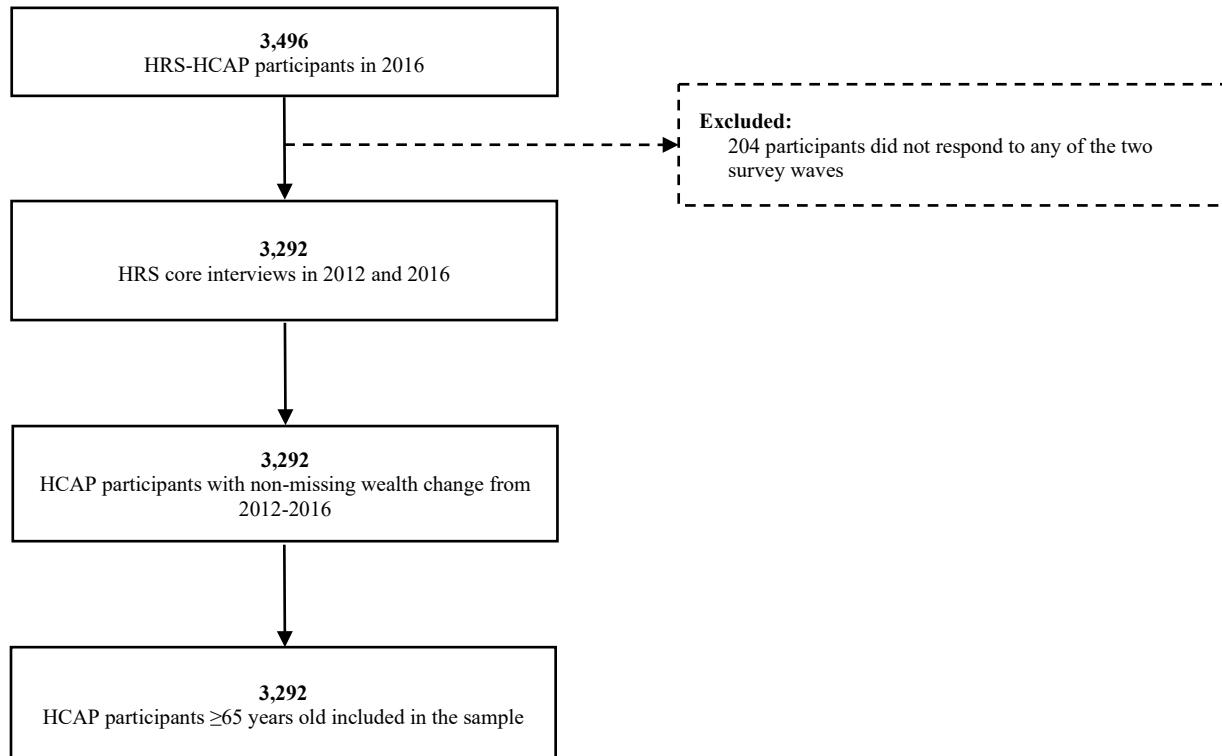

**Negative wealth shocks in later life and subsequent cognitive function among older adults: a population-based longitudinal harmonized study in China, England, Mexico, and the United States, 2012-2018**

Tsai-Chin Cho, Xuexin Yu, Alden L. Gross, Yuan S. Zhang, Jinkook Lee, Kenneth M. Langa, Lindsay C. Kobayashi

**Supplemental Table 2. Summary of wealth components incorporated in household wealth, by country**

|                                      | HRS (US) | ELSA (England) | MHAS (Mexico) | CHARLS (China) |
|--------------------------------------|----------|----------------|---------------|----------------|
| Primary and secondary home residence | x        | x              | x             | x <sup>a</sup> |
| Farm or business assets              | x        | x              | x             | x <sup>b</sup> |
| Vehicles                             | x        |                | x             | x <sup>c</sup> |
| Non-housing financial wealth*        | x        | x              | x             | x              |
| Debts**                              | x        | x              | x             | x              |

\* Non-housing financial wealth includes stocks, mutual funds, investment trusts, checking accounts, saving accounts, money market accounts, bonds, bond funds, CDs, government savings bonds, and treasury bills.

\*\* Debts include mortgages and house loans on primary and secondary residences, mortgages and loans on vehicles, and other debts.

<sup>a</sup> Primary residence with % of ownership and value of other residential properties are considered.

<sup>b</sup> All fixed capital assets worth 500 yuan and more, as well as livestock are considered.

<sup>c</sup> In addition to vehicles, other durable assets worth 500 yuan and more are also considered.



**Negative wealth shocks in later life and subsequent cognitive function among older adults: a population-based longitudinal harmonized study in China, England, Mexico, and the United States, 2012-2018**

Tsai-Chin Cho, Xuexin Yu, Alden L. Gross, Yuan S. Zhang, Jinkook Lee, Kenneth M. Langa, Lindsay C. Kobayashi

**Supplemental Table 3. Characteristics of CHARLS-HCAP participants aged ≥65, comparing older adults included in the study sample vs excluded from the sample due to missing wealth information in 2015**

|                                                            | Study sample<br>N=3,796 |           | Excluded sample<br>N=2,366 |           | P-value from testing<br>difference in<br>mean/median/% |
|------------------------------------------------------------|-------------------------|-----------|----------------------------|-----------|--------------------------------------------------------|
| <b>Baseline characteristics</b>                            |                         |           |                            |           |                                                        |
| Age (years); mean (SD)                                     | 68.5                    | (5.4)     | 69.1                       | (6.0)     | <0.0001                                                |
| Female; N (%)                                              | 1,890                   | (49.8)    | 1,232                      | (52.1)    | 0.08                                                   |
| Marital status; N (%)                                      |                         |           |                            |           |                                                        |
| Married/partnered                                          | 3,001                   | (79.1)    | 1,904                      | (80.5)    |                                                        |
| Separated/divorced                                         | 24                      | (0.6)     | 8                          | (0.3)     |                                                        |
| Widowed                                                    | 747                     | (19.7)    | 436                        | (18.4)    | 0.23                                                   |
| Never married                                              | 24                      | (0.6)     | 18                         | (0.8)     |                                                        |
| Minority group; N (%)                                      | 2,427                   | (63.9)    | 1,396                      | (59.0)    | 0.0001                                                 |
| Median household size (persons)                            | 2                       | (1; 2, 3) | 3                          | (1; 2, 3) | 0.01                                                   |
| Education attainment; N (%)                                |                         |           |                            |           |                                                        |
| Primary or below                                           | 3,555                   | 93.7      | 2,185                      | 92.4      |                                                        |
| Secondary                                                  | 195                     | 5.1       | 136                        | 5.8       | 0.05                                                   |
| Higher than secondary                                      | 46                      | 1.2       | 45                         | 1.9       |                                                        |
| Father's education attainment; N (%)                       |                         |           |                            |           |                                                        |
| Less than primary                                          | 2,783                   | 74.3      | 1,680                      | 72.6      |                                                        |
| Primary                                                    | 784                     | 20.9      | 507                        | 21.9      | 0.23                                                   |
| Secondary or higher                                        | 178                     | 4.8       | 128                        | 5.5       |                                                        |
| Mother's education attainment; N (%)                       |                         |           |                            |           |                                                        |
| Less than primary                                          | 3,625                   | 96.4      | 2,251                      | 96.7      |                                                        |
| Primary                                                    | 106                     | 2.8       | 54                         | 2.3       | 0.45                                                   |
| Secondary or higher                                        | 31                      | 0.8       | 22                         | 1.0       |                                                        |
| Smoking status; N (%)                                      |                         |           |                            |           |                                                        |
| Current smoker                                             | 1,057                   | 27.9      | 607                        | 25.8      |                                                        |
| Former smoker                                              | 732                     | 19.3      | 451                        | 19.2      | 0.18                                                   |
| Never smoke                                                | 2,002                   | 52.8      | 1,291                      | 55.0      |                                                        |
| BMI category (kg/m <sup>2</sup> ); N (%)                   |                         |           |                            |           |                                                        |
| Underweight/normal; <25                                    | 2,318                   | 68.8      | 1,328                      | 69.0      |                                                        |
| Overweight; 25-29.9                                        | 889                     | 26.4      | 509                        | 26.5      | 0.93                                                   |
| Obese; ≥30                                                 | 160                     | 4.8       | 87                         | 4.5       |                                                        |
| Number of self-reported diagnosed health conditions; N (%) |                         |           |                            |           |                                                        |
| 0                                                          | 824                     | 24.1      | 538                        | 26.4      |                                                        |
| 1                                                          | 1,329                   | 38.9      | 782                        | 38.3      |                                                        |
| 2                                                          | 885                     | 25.9      | 532                        | 26.1      | 0.08                                                   |
| ≥3                                                         | 376                     | 11.0      | 188                        | 9.2       |                                                        |
| Number of self-reported general health; N (%)              |                         |           |                            |           |                                                        |
| Excellent                                                  | 47                      | 1.2       | 21                         | 0.9       |                                                        |
| Very good                                                  | 372                     | 9.8       | 181                        | 8.1       |                                                        |
| Good                                                       | 431                     | 11.4      | 250                        | 11.3      | 0.19                                                   |
| Fair                                                       | 2,043                   | 53.9      | 1,224                      | 55.1      |                                                        |
| Poor                                                       | 901                     | 23.8      | 547                        | 24.6      |                                                        |
| Positive for depressive symptoms; N (%)                    | 1,376                   | 36.3      | 752                        | 34.1      | 0.09                                                   |
| Baseline memory score quartiles; N (%)                     |                         |           |                            |           |                                                        |
| ≤25%                                                       | 1,025                   | 27.9      | 668                        | 31.9      |                                                        |
| 26-50%                                                     | 1,132                   | 30.8      | 599                        | 28.6      |                                                        |
| 51-75%                                                     | 1,016                   | 27.6      | 529                        | 25.3      | 0.01                                                   |
| >75%                                                       | 507                     | 13.8      | 296                        | 14.2      |                                                        |
| <b>Outcome</b>                                             |                         |           |                            |           |                                                        |
| GCF factor scores; mean (SD)                               | -1.3                    | (0.9)     | -1.3                       | (1.0)     | 0.23                                                   |

Note:

The baseline characteristics are obtained from the core interviews of the China Health and Retirement Longitudinal Study (CHARLS) in 2015. The outcome of GCF factor scores is constructed based on the CHARLS-HCAP in 2018. The participant characteristics in both samples are not imputed. All values are not sampling-weighted.

**Negative wealth shocks in later life and subsequent cognitive function among older adults: a population-based longitudinal harmonized study in China, England, Mexico, and the United States, 2012-2018**

Tsai-Chin Cho, Xuexin Yu, Alden L. Gross, Yuan S. Zhang, Jinkook Lee, Kenneth M. Langa, Lindsay C. Kobayashi

**Supplemental Table 4. Characteristics of ELSA-HCAP participants aged  $\geq 65$ , comparing older adults included in the study sample vs excluded from the sample due to missing wealth shocks**

|                                                            | Study sample<br>N=1,184 |           | Excluded sample<br>N=24 |           | P-value from testing<br>difference in<br>mean/median/% |
|------------------------------------------------------------|-------------------------|-----------|-------------------------|-----------|--------------------------------------------------------|
| <b>Baseline characteristics</b>                            |                         |           |                         |           |                                                        |
| Age (years); mean (SD)                                     | 72.0                    | (7.0)     | 71.5                    | (8.5)     | 0.82                                                   |
| Female; N (%)                                              | 646                     | 54.6      | 17                      | 70.8      | 0.11                                                   |
| Marital status; N (%)                                      |                         |           |                         |           |                                                        |
| Married/partnered                                          | 808                     | 68.3      | 10                      | 41.7      |                                                        |
| Separated/divorced                                         | 101                     | 8.5       | 7                       | 29.2      |                                                        |
| Widowed                                                    | 220                     | 18.6      | 7                       | 29.2      | 0.001                                                  |
| Never married                                              | 54                      | 4.6       | 0                       | 0.0       |                                                        |
| Minority group; N (%)                                      | 38                      | 3.2       | 0                       | 0.0       | 0.37                                                   |
| Median household size (persons)                            | 2                       | (1; 1, 2) | 2                       | (1; 1, 2) | 0.45                                                   |
| Education attainment; N (%)                                |                         |           |                         |           |                                                        |
| Primary or below                                           | 461                     | 38.9      | 9                       | 37.5      |                                                        |
| Secondary                                                  | 219                     | 18.5      | 5                       | 20.8      | 0.96                                                   |
| Higher than secondary                                      | 504                     | 42.6      | 10                      | 41.7      |                                                        |
| Father's education attainment; N (%)                       |                         |           |                         |           |                                                        |
| Less than primary                                          | 25                      | 2.2       | 0                       | 0.0       |                                                        |
| Primary                                                    | 0                       | 0.0       | 0                       | 0.0       | 0.48                                                   |
| Secondary or higher                                        | 1,133                   | 97.8      | 23                      | 100.0     |                                                        |
| Mother's education attainment; N (%)                       |                         |           |                         |           |                                                        |
| Less than primary                                          | 28                      | 2.4       | 0                       | 0.0       |                                                        |
| Primary                                                    | 0                       | 0.0       | 0                       | 0.0       | 0.44                                                   |
| Secondary or higher                                        | 1,144                   | 97.6      | 24                      | 100.0     |                                                        |
| Smoking status; N (%)                                      |                         |           |                         |           |                                                        |
| Current smoker                                             | 108                     | 9.1       | 2                       | 8.3       |                                                        |
| Former smoker                                              | 646                     | 54.6      | 15                      | 62.5      | 0.73                                                   |
| Never smoke                                                | 430                     | 36.3      | 7                       | 29.2      |                                                        |
| BMI category (kg/m <sup>2</sup> ); N (%)                   |                         |           |                         |           |                                                        |
| Underweight/normal; <25                                    | 253                     | 24.1      | 6                       | 26.1      |                                                        |
| Overweight; 25-29.9                                        | 450                     | 42.9      | 13                      | 56.5      | 0.26                                                   |
| Obese; $\geq 30$                                           | 346                     | 33.0      | 4                       | 17.4      |                                                        |
| Number of self-reported diagnosed health conditions; N (%) |                         |           |                         |           |                                                        |
| 0                                                          | 290                     | 24.5      | 9                       | 37.5      |                                                        |
| 1                                                          | 430                     | 36.3      | 10                      | 41.7      |                                                        |
| 2                                                          | 333                     | 28.1      | 3                       | 12.5      | 0.26                                                   |
| $\geq 3$                                                   | 131                     | 11.1      | 2                       | 8.3       |                                                        |
| Number of self-reported general health; N (%)              |                         |           |                         |           |                                                        |
| Excellent                                                  | 116                     | 9.9       | 2                       | 8.3       |                                                        |
| Very good                                                  | 332                     | 28.3      | 6                       | 25.0      |                                                        |
| Good                                                       | 400                     | 34.0      | 9                       | 37.5      | 0.99                                                   |
| Fair                                                       | 247                     | 21.0      | 5                       | 20.8      |                                                        |
| Poor                                                       | 80                      | 6.8       | 2                       | 8.3       |                                                        |
| Positive for depressive symptoms; N (%)                    | 234                     | 20.0      | 4                       | 16.7      | 0.69                                                   |
| Baseline memory score quartiles; N (%)                     |                         |           |                         |           |                                                        |
| $\leq 25\%$                                                | 511                     | 43.5      | 8                       | 33.3      |                                                        |
| 26-50%                                                     | 259                     | 22.0      | 5                       | 20.8      |                                                        |
| 51-75%                                                     | 221                     | 18.8      | 7                       | 29.2      | 0.59                                                   |
| $> 75\%$                                                   | 184                     | 15.7      | 4                       | 16.7      |                                                        |
| <b>Outcome</b>                                             |                         |           |                         |           |                                                        |
| GCF factor scores; mean (SD)                               | -0.04                   | (1.0)     | -0.1                    | (1.6)     | 0.76                                                   |

Note:

The baseline characteristics are obtained from the core interviews of the English Longitudinal Study of Ageing (ELSA) in 2012. The outcome of GCF factor scores is constructed based on the ELSA-HCAP in 2016. The participant characteristics in both samples are not imputed. All values are not sampling-weighted.

**Negative wealth shocks in later life and subsequent cognitive function among older adults: a population-based longitudinal harmonized study in China, England, Mexico, and the United States, 2012-2018**

Tsai-Chin Cho, Xuexin Yu, Alden L. Gross, Yuan S. Zhang, Jinkook Lee, Kenneth M. Langa, Lindsay C. Kobayashi

**Supplemental Figure 2. Directed acyclic graph (DAG) that guided selection of plausible confounders**

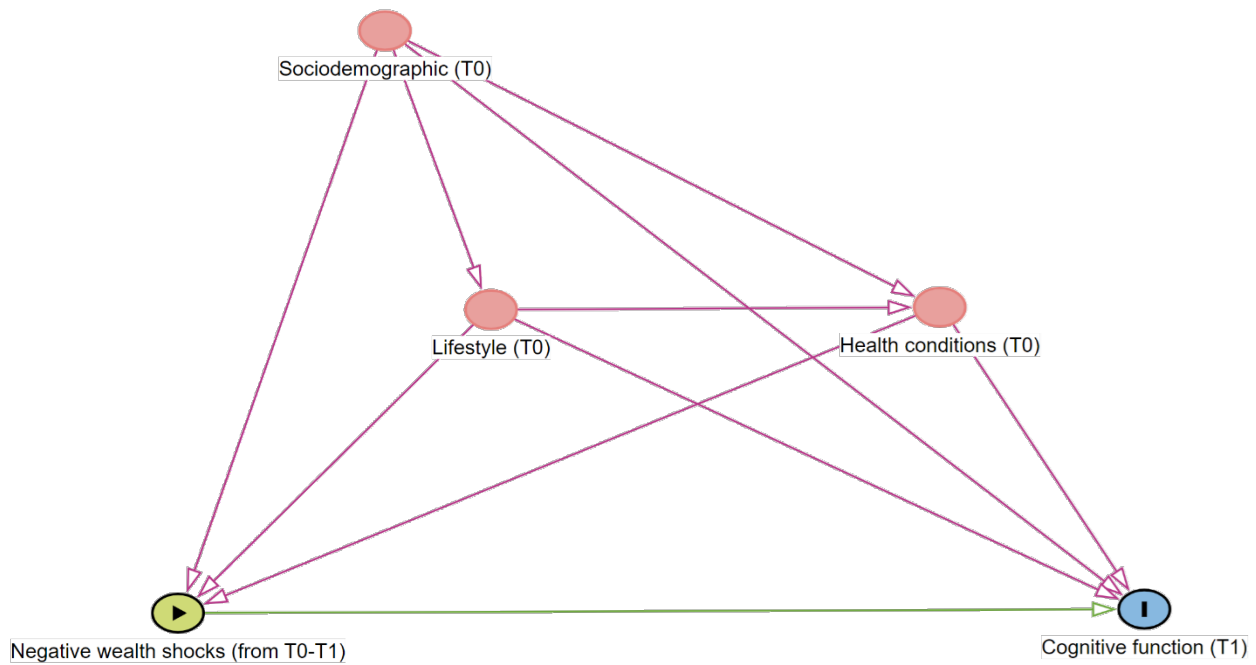

Note:

The green, blue, and pink nodes respectively represent the exposure measured from the baseline (T0) of the study periods to the follow-up time-point (T1), the outcome measured at the follow-up time, and the confounders of the sociodemographic, lifestyle-related, and health-related factors measured at the baseline. Sociodemographic factors are age, sex/gender, marital status, minority status, education level, parent's education level, and baseline wealth quintile. Lifestyle-related factors are smoking status and BMI. Health-related factors are self-reported diagnosed health conditions, self-reported general health, positive for depressive symptoms, and baseline memory score quartile. All the confounding pathways (pink lines) in the DAG can be closed by adjusting for the sociodemographic, lifestyle-related, and health-related factors.

**Negative wealth shocks in later life and subsequent cognitive function among older adults: a population-based longitudinal harmonized study in China, England, Mexico, and the United States, 2012-2018**

Tsai-Chin Cho, Xuexin Yu, Alden L. Gross, Yuan S. Zhang, Jinkook Lee, Kenneth M. Langa, Lindsay C. Kobayashi

**Supplemental Table 5. Percent of missing data in covariates before imputation, by country**

| Characteristic                            | % missingness before imputation by study |                 |                 |                   |
|-------------------------------------------|------------------------------------------|-----------------|-----------------|-------------------|
|                                           | HRS<br>N=3,292                           | ELSA<br>N=1,184 | MHAS<br>N=1,193 | CHARLS<br>N=3,796 |
| Age                                       | 0·0                                      | 0·0             | 0·0             | 0·0               |
| Gender                                    | 0·0                                      | 0·0             | 0·0             | 0·0               |
| Marital status                            | 0·0                                      | 0·1             | 0·0             | 0·0               |
| Minority status                           | 0·0                                      | 0·0             | 0·0             | 0·0               |
| Household size                            | 0·0                                      | 0·0             | 0·0             | 0·0               |
| Education attainment                      | 0·1                                      | 0·0             | 0·5             | 0·0               |
| Father's education attainment             | 13·6                                     | 2·2             | 14·3            | 1·3               |
| Mother's education attainment             | 8·0                                      | 1·0             | 12·1            | 0·9               |
| Wealth quintiles                          | 0·0                                      | 0·0             | 0·0             | 0·0               |
| Smoking status                            | 0·6                                      | 0·0             | 0·0             | 0·1               |
| BMI category                              | 0·9                                      | 11·4            | 9·3             | 11·3              |
| Self-reported diagnosed health conditions | 0·9                                      | 0·0             | 0·7             | 10·1              |
| Self-reported general health              | 0·1                                      | 0·8             | 4·0             | 0·1               |
| Positive for depressive symptoms          | 1·3                                      | 1·2             | 4·0             | 0·1               |
| Memory score quartiles                    | 1·3                                      | 0·8             | 4·0             | 3·1               |

**Negative wealth shocks in later life and subsequent cognitive function among older adults: a population-based longitudinal harmonized study in China, England, Mexico, and the United States, 2012-2018**

Tsai-Chin Cho, Xuexin Yu, Alden L. Gross, Yuan S. Zhang, Jinkook Lee, Kenneth M. Langa, Lindsay C. Kobayashi

**Supplemental Table 6. Coefficients for negative wealth shocks and subsequent cognitive function, comparing the main study results vs additional adjustment for time-varying confounders using inverse probability of treatment (IPTW)**

|                                           | Main study results <sup>a</sup> |        |       |                                                          | Additional adjustment for time-varying confounders using IPTW <sup>b</sup> |        |       |                                                          |
|-------------------------------------------|---------------------------------|--------|-------|----------------------------------------------------------|----------------------------------------------------------------------------|--------|-------|----------------------------------------------------------|
|                                           | Stratified analyses             |        |       | P-value of cross-country interaction effect <sup>c</sup> | Stratified analyses                                                        |        |       | P-value of cross-country interaction effect <sup>c</sup> |
|                                           | B                               | 95% CI |       |                                                          | B                                                                          | 95% CI |       |                                                          |
| <b>Negative wealth shock</b>              |                                 |        |       |                                                          |                                                                            |        |       |                                                          |
| Extreme wealth loss (vs not) <sup>d</sup> |                                 |        |       |                                                          |                                                                            |        |       |                                                          |
| US                                        | -0.16                           | -0.29  | -0.04 | (ref)                                                    | -0.14                                                                      | -0.25  | -0.03 | (ref)                                                    |
| England                                   | -0.01                           | -0.24  | 0.22  | 0.47                                                     | 0.01                                                                       | -0.24  | 0.25  | 0.49                                                     |
| Mexico                                    | -0.11                           | -0.24  | 0.03  | 0.67                                                     | -0.10                                                                      | -0.24  | 0.03  | 0.89                                                     |
| China                                     | -0.14                           | -0.21  | -0.07 | 0.70                                                     | -0.14                                                                      | -0.20  | -0.07 | 0.87                                                     |
| Wealth rank decline (-4 to 4)             |                                 |        |       |                                                          |                                                                            |        |       |                                                          |
| US                                        | -0.07                           | -0.11  | -0.03 | (ref)                                                    | -0.06                                                                      | -0.09  | -0.02 | (ref)                                                    |
| England                                   | -0.05                           | -0.11  | 0.01  | 0.43                                                     | -0.04                                                                      | -0.11  | 0.02  | 0.61                                                     |
| Mexico                                    | -0.03                           | -0.07  | 0.01  | 0.02                                                     | -0.03                                                                      | -0.07  | 0.01  | 0.09                                                     |
| China                                     | -0.07                           | -0.09  | -0.04 | 0.13                                                     | -0.06                                                                      | -0.09  | -0.04 | 0.35                                                     |

Note: All estimates accounted for survey sampling weights and household clusters. The p-values from pooled analyses additionally accounted for country strata.

<sup>a</sup> All results were adjusted for age, age<sup>2</sup>, sex/gender, marital status, minority status, education level, parent's education level, baseline wealth quintile, smoking status, BMI, self-reported diagnosed health conditions, self-reported general health, positive for depressive symptoms, and baseline memory score quartile.

<sup>b</sup> Inverse probability of treatment weighting (IPTW) was used to adjust for the time-varying confounding effect of marital status, self-reported diagnosed health conditions, self-reported general health, and positive for depressive symptoms. Survey weights were considered in the construction of both the IPTW and the final weights - the product of the IPW and sampling weights.

<sup>c</sup> The interaction effect of wealth changes and country using the HRS as the reference.

<sup>d</sup> An extreme wealth loss is a  $\geq 75\%$  decrease in wealth from the baseline amount.

**Negative wealth shocks in later life and subsequent cognitive function among older adults: a population-based longitudinal harmonized study in China, England, Mexico, and the United States, 2012-2018**

Tsai-Chin Cho, Xuexin Yu, Alden L. Gross, Yuan S. Zhang, Jinkook Lee, Kenneth M. Langa, Lindsay C. Kobayashi

**Supplemental Table 7. Coefficients for negative wealth shocks and subsequent cognitive function, comparing the main study results vs results using house value as the exposure**

| Negative wealth shock                     | Main study results <sup>a</sup> |        |       |                                                          | Exposure restricted to house value <sup>b</sup> |        |       |                                                          |
|-------------------------------------------|---------------------------------|--------|-------|----------------------------------------------------------|-------------------------------------------------|--------|-------|----------------------------------------------------------|
|                                           | Stratified analyses             |        |       | P-value of cross-country interaction effect <sup>c</sup> | Stratified analyses                             |        |       | P-value of cross-country interaction effect <sup>c</sup> |
|                                           | B                               | 95% CI |       |                                                          | B                                               | 95% CI |       |                                                          |
| Extreme wealth loss (vs not) <sup>d</sup> |                                 |        |       |                                                          |                                                 |        |       |                                                          |
| US                                        | -0.16                           | -0.29  | -0.04 | (ref)                                                    | -0.35                                           | -0.48  | -0.22 | (ref)                                                    |
| England                                   | -0.01                           | -0.24  | 0.22  | 0.47                                                     | 0.00                                            | -0.35  | 0.36  | 0.26                                                     |
| Mexico                                    | -0.11                           | -0.24  | 0.03  | 0.67                                                     | -0.12                                           | -0.25  | 0.00  | 0.02                                                     |
| China                                     | -0.14                           | -0.21  | -0.07 | 0.70                                                     | -0.15                                           | -0.21  | -0.08 | 0.01                                                     |
| Wealth rank decline (-4 to 4)             |                                 |        |       |                                                          |                                                 |        |       |                                                          |
| US                                        | -0.07                           | -0.11  | -0.03 | (ref)                                                    | -0.06                                           | -0.10  | -0.03 | (ref)                                                    |
| England                                   | -0.05                           | -0.11  | 0.01  | 0.43                                                     | -0.01                                           | -0.07  | 0.04  | 0.25                                                     |
| Mexico                                    | -0.03                           | -0.07  | 0.01  | 0.02                                                     | -0.03                                           | -0.06  | 0.01  | 0.11                                                     |
| China                                     | -0.07                           | -0.09  | -0.04 | 0.13                                                     | -0.04                                           | -0.06  | -0.02 | 0.22                                                     |

Note: All estimates accounted for survey sampling weights and household clusters. The p-values from pooled analyses additionally accounted for country strata.

<sup>a</sup> All results were adjusted for age, age<sup>2</sup>, sex/gender, marital status, minority status, education level, parent's education level, baseline wealth quintile, smoking status, BMI, self-reported diagnosed health conditions, self-reported general health, positive for depressive symptoms, and baseline memory score quartile.

<sup>b</sup> House value is the gross value of primary residence.

<sup>c</sup> The interaction effect of wealth changes and country using the HRS as the reference.

<sup>d</sup> An extreme wealth loss is a  $\geq 75\%$  decrease in wealth from the baseline amount.

**Negative wealth shocks in later life and subsequent cognitive function among older adults: a population-based longitudinal harmonized study in China, England, Mexico, and the United States, 2012-2018**

Tsai-Chin Cho, Xuexin Yu, Alden L. Gross, Yuan S. Zhang, Jinkook Lee, Kenneth M. Langa, Lindsay C. Kobayashi

**Supplemental Table 8. Coefficients for negative wealth shocks and subsequent cognitive function, comparing the main study results vs results using liquid assets as the exposure**

| Negative wealth shock                     | Main study results <sup>a</sup> |        |                                                          |       | Exposure restricted to liquid assets <sup>b</sup> |        |                                                          |       |
|-------------------------------------------|---------------------------------|--------|----------------------------------------------------------|-------|---------------------------------------------------|--------|----------------------------------------------------------|-------|
|                                           | Stratified analyses             |        | P-value of cross-country interaction effect <sup>c</sup> |       | Stratified analyses                               |        | P-value of cross-country interaction effect <sup>c</sup> |       |
|                                           | B                               | 95% CI |                                                          |       | B                                                 | 95% CI |                                                          |       |
| Extreme wealth loss (vs not) <sup>d</sup> |                                 |        |                                                          |       |                                                   |        |                                                          |       |
| US                                        | -0.16                           | -0.29  | -0.04                                                    | (ref) | 0.03                                              | -0.04  | 0.09                                                     | (ref) |
| England                                   | -0.01                           | -0.24  | 0.22                                                     | 0.47  | -0.07                                             | -0.17  | 0.04                                                     | 0.12  |
| Mexico                                    | -0.11                           | -0.24  | 0.03                                                     | 0.67  | 0.05                                              | -0.06  | 0.16                                                     | 0.92  |
| China                                     | -0.14                           | -0.21  | -0.07                                                    | 0.70  | -0.11                                             | -0.17  | -0.04                                                    | 0.002 |
| Wealth rank decline (-4 to 4)             |                                 |        |                                                          |       |                                                   |        |                                                          |       |
| US                                        | -0.07                           | -0.11  | -0.03                                                    | (ref) | -0.01                                             | -0.04  | 0.01                                                     | (ref) |
| England                                   | -0.05                           | -0.11  | 0.01                                                     | 0.43  | -0.02                                             | -0.06  | 0.02                                                     | 0.81  |
| Mexico                                    | -0.03                           | -0.07  | 0.01                                                     | 0.02  | 0.01                                              | -0.01  | 0.03                                                     | 0.26  |
| China                                     | -0.07                           | -0.09  | -0.04                                                    | 0.13  | -0.04                                             | -0.06  | -0.02                                                    | 0.19  |

Note: All estimates accounted for survey sampling weights and household clusters. The p-values from pooled analyses additionally accounted for country strata.

<sup>a</sup> All results were adjusted for age, age<sup>2</sup>, sex/gender, marital status, minority status, education level, parent's education level, baseline wealth quintile, smoking status, BMI, self-reported diagnosed health conditions, self-reported general health, positive for depressive symptoms, and baseline memory score quartile.

<sup>b</sup> Liquid assets mean non-housing financial wealth, excluding the value of any real estate, vehicles, or businesses.

<sup>c</sup> The interaction effect of wealth changes and country using the HRS as the reference.

<sup>d</sup> An extreme wealth loss is a  $\geq 75\%$  decrease in wealth from the baseline amount.

**Negative wealth shocks in later life and subsequent cognitive function among older adults: a population-based longitudinal harmonized study in China, England, Mexico, and the United States, 2012-2018**

Tsai-Chin Cho, Xuexin Yu, Alden L. Gross, Yuan S. Zhang, Jinkook Lee, Kenneth M. Langa, Lindsay C. Kobayashi

**Supplemental Table 9. Coefficients for negative wealth shocks and subsequent cognitive function, comparing the main study results vs results using wealth decile rank as the exposure**

| Negative wealth shock                     | Stratified analyses |        |       | P-value of cross-country interaction effect <sup>a</sup> |
|-------------------------------------------|---------------------|--------|-------|----------------------------------------------------------|
|                                           | B                   | 95% CI |       |                                                          |
| Extreme wealth loss (vs not) <sup>b</sup> |                     |        |       |                                                          |
| US                                        | -0.16               | -0.29  | -0.04 | (ref)                                                    |
| England                                   | -0.01               | -0.24  | 0.22  | 0.47                                                     |
| Mexico                                    | -0.11               | -0.24  | 0.03  | 0.67                                                     |
| China                                     | -0.14               | -0.21  | -0.07 | 0.70                                                     |
| Wealth rank decline (-4 to 4)             |                     |        |       |                                                          |
| US                                        | -0.07               | -0.11  | -0.03 | (ref)                                                    |
| England                                   | -0.05               | -0.11  | 0.01  | 0.43                                                     |
| Mexico                                    | -0.03               | -0.07  | 0.01  | 0.02                                                     |
| China                                     | -0.07               | -0.09  | -0.04 | 0.13                                                     |
| Wealth decile decline (-9 to 9)           |                     |        |       |                                                          |
| US                                        | -0.04               | -0.06  | -0.01 | (ref)                                                    |
| England                                   | -0.02               | -0.05  | 0.01  | 0.37                                                     |
| Mexico                                    | -0.01               | -0.03  | 0.01  | 0.02                                                     |
| China                                     | -0.03               | -0.04  | -0.02 | 0.11                                                     |

Note: All estimates accounted for survey sampling weights and household clusters. Also, they were adjusted for age, age<sup>2</sup>, sex/gender, marital status, minority status, education level, parent's education level, baseline wealth quintile, smoking status, BMI, self-reported diagnosed health conditions, self-reported general health, and positive for depressive symptoms.

<sup>a</sup> The interaction effect of wealth changes and country using the HRS as the reference.

<sup>b</sup> An extreme wealth loss is a  $\geq 75\%$  decrease in wealth from the baseline amount.



**Negative wealth shocks in later life and subsequent cognitive function among older adults: a population-based longitudinal harmonized study in China, England, Mexico, and the United States, 2012-2018**

Tsai-Chin Cho, Xuexin Yu, Alden L. Gross, Yuan S. Zhang, Jinkook Lee, Kenneth M. Langa, Lindsay C. Kobayashi

**Supplemental Table 10. Coefficients for negative wealth shocks and subsequent cognitive function, comparing the main study results vs results based on the subsample at retirement age at baseline**

| Negative wealth shock                     | Main study results <sup>a</sup> |        |       |                                                          | The subsample of those at retirement age at baseline <sup>b</sup> |        |       |                                                          |
|-------------------------------------------|---------------------------------|--------|-------|----------------------------------------------------------|-------------------------------------------------------------------|--------|-------|----------------------------------------------------------|
|                                           | Stratified analyses             |        |       | P-value of cross-country interaction effect <sup>c</sup> | Stratified analyses                                               |        |       | P-value of cross-country interaction effect <sup>c</sup> |
|                                           | B                               | 95% CI |       |                                                          | B                                                                 | 95% CI |       |                                                          |
| Extreme wealth loss (vs not) <sup>d</sup> |                                 |        |       |                                                          |                                                                   |        |       |                                                          |
| US                                        | -0.16                           | -0.29  | -0.04 | (ref)                                                    | -0.25                                                             | -0.38  | -0.12 | (ref)                                                    |
| England                                   | -0.01                           | -0.24  | 0.22  | 0.47                                                     | -0.10                                                             | -0.31  | 0.11  | 0.73                                                     |
| Mexico                                    | -0.11                           | -0.24  | 0.03  | 0.67                                                     | -0.11                                                             | -0.27  | 0.05  | 0.37                                                     |
| China                                     | -0.14                           | -0.21  | -0.07 | 0.70                                                     | -0.14                                                             | -0.21  | -0.07 | 0.29                                                     |
| Wealth rank decline (-4 to 4)             |                                 |        |       |                                                          |                                                                   |        |       |                                                          |
| US                                        | -0.07                           | -0.11  | -0.03 | (ref)                                                    | -0.10                                                             | -0.14  | -0.05 | (ref)                                                    |
| England                                   | -0.05                           | -0.11  | 0.01  | 0.43                                                     | -0.06                                                             | -0.13  | 0.01  | 0.19                                                     |
| Mexico                                    | -0.03                           | -0.07  | 0.01  | 0.02                                                     | -0.04                                                             | -0.08  | 0.01  | 0.01                                                     |
| China                                     | -0.07                           | -0.09  | -0.04 | 0.13                                                     | -0.07                                                             | -0.09  | -0.04 | 0.03                                                     |

Note: All estimates accounted for survey sampling weights and household clusters. The p-values from pooled analyses additionally accounted for country strata.

<sup>a</sup> All results were adjusted for age, age<sup>2</sup>, sex/gender, marital status, minority status, education level, parent's education level, baseline wealth quintile, smoking status, BMI, self-reported diagnosed health conditions, self-reported general health, and positive for depressive symptoms.

<sup>b</sup> The older adults in the subsample are  $\geq 66$  years in the US,  $\geq 65$  in England and Mexico, and  $\geq 60$  in China; N=2,569 in the US, 985 in England, 930 in Mexico, and 3,796 in China.

<sup>c</sup> The interaction effect of wealth changes and country using the HRS as the reference.

<sup>d</sup> An extreme wealth loss is a  $\geq 75\%$  decrease in wealth from the baseline amount.

**Negative wealth shocks in later life and subsequent cognitive function among older adults: a population-based longitudinal harmonized study in China, England, Mexico, and the United States, 2012-2018**

Tsai-Chin Cho, Xuexin Yu, Alden L. Gross, Yuan S. Zhang, Jinkook Lee, Kenneth M. Langa, Lindsay C. Kobayashi

**Supplemental Table 11. Coefficients for negative wealth shocks and subsequent cognitive function, comparing the main study results vs results using data without imputation for missing data in covariates**

| Negative wealth shock                     | Main study results <sup>a</sup> |        |       |                                                          | Unimputed covariates |        |       |                                                          |
|-------------------------------------------|---------------------------------|--------|-------|----------------------------------------------------------|----------------------|--------|-------|----------------------------------------------------------|
|                                           | Stratified analyses             |        |       | P-value of cross-country interaction effect <sup>b</sup> | Stratified analyses  |        |       | P-value of cross-country interaction effect <sup>b</sup> |
|                                           | B                               | 95% CI |       |                                                          | B                    | 95% CI |       |                                                          |
| Extreme wealth loss (vs not) <sup>c</sup> |                                 |        |       |                                                          |                      |        |       |                                                          |
| US                                        | -0.16                           | -0.29  | -0.04 | (ref)                                                    | -0.16                | -0.30  | -0.02 | (ref)                                                    |
| England                                   | -0.01                           | -0.24  | 0.22  | 0.47                                                     | 0.07                 | -0.19  | 0.32  | 0.31                                                     |
| Mexico                                    | -0.11                           | -0.24  | 0.03  | 0.67                                                     | -0.05                | -0.20  | 0.09  | 0.37                                                     |
| China                                     | -0.14                           | -0.21  | -0.07 | 0.70                                                     | -0.13                | -0.21  | -0.06 | 0.71                                                     |
| Wealth rank decline (-4 to 4)             |                                 |        |       |                                                          |                      |        |       |                                                          |
| US                                        | -0.07                           | -0.11  | -0.03 | (ref)                                                    | -0.07                | -0.11  | -0.02 | (ref)                                                    |
| England                                   | -0.05                           | -0.11  | 0.01  | 0.43                                                     | -0.04                | -0.11  | 0.03  | 0.39                                                     |
| Mexico                                    | -0.03                           | -0.07  | 0.01  | 0.02                                                     | -0.03                | -0.07  | 0.01  | 0.05                                                     |
| China                                     | -0.07                           | -0.09  | -0.04 | 0.13                                                     | -0.06                | -0.08  | -0.03 | 0.16                                                     |

Note: All estimates accounted for survey sampling weights and household clusters. The p-values from pooled analyses additionally accounted for country strata.

<sup>a</sup> All results were adjusted for age, age<sup>2</sup>, sex/gender, marital status, minority status, education level, parent's education level, baseline wealth quintile, smoking status, BMI, self-reported diagnosed health conditions, self-reported general health, and positive for depressive symptoms.

<sup>b</sup> The interaction effect of wealth changes and country using the HRS as the reference.

<sup>c</sup> An extreme wealth loss is a  $\geq 75\%$  decrease in wealth from the baseline amount.
